# Supplementary material for: The association between dietary protein intake and esophageal cancer risk: a meta-analysis
Source: Oxford University Press journal article supplement (doi:10.1042/bsr20193692), 2019-12-13
Supplement: bsr-2019-3692_supp.pdf [file bsr-2019-3692_supp.pdf]

Supplementary table 1 Search criteria for computerized literature search conducted in PubMed.

| Search | Search terms and combinations                                                                                                    |
|--------|----------------------------------------------------------------------------------------------------------------------------------|
| 1      | ("diet" [Text Word] OR "dietary" [Text Word])                                                                                    |
| 2      | "protein" [Text Word]                                                                                                            |
| 3      | ("esophageal cancer" [Text Word] OR "esophageal adenocarcinoma" [Text Word] OR "esophageal squamous cell carcinoma" [Text Word]) |
| 4      | 1 AND 2 AND 3                                                                                                                    |

Supplementary table 2 Detailed information about quality assessment in each included study.

| Study                  | Selection(****) | Comparability(**) | Exposure(***) | Total |
|------------------------|-----------------|-------------------|---------------|-------|
| Chen et al. 2002       | ****            | *                 | **            | 7     |
| De Stefani et al. 1999 | ***             | **                | **            | 7     |
| De Stefani et al. 2006 | ***             | *                 | ***           | 7     |
| Jessri et al. 2011     | ****            | *                 | ***           | 8     |
| Lagergren et al. 2013  | ***             | **                | ***           | 8     |
| Mayne et al. 2001      | ***             | *                 | ***           | 7     |
| Tuyns et al. 1987      | ***             | *                 | **            | 6     |
| Tzonou et al. 1996     | ***             | **                | **            | 7     |
| Wolfgarten et al. 2001 | ****            | **                | **            | 8     |
| Wu et al. 2007         | ****            | *                 | ***           | 8     |
| Zhang et al. 1997      | ***             | *                 | ***           | 7     |

Supplementary table 3 Sensitivity analyses about protein intake and risk of esophageal cancer.

| Study omitted          | Disease type                       | OR(95%CI)       |
|------------------------|------------------------------------|-----------------|
| Chen et al. 2002       | Esophageal adenocarcinoma          | 1.17(0.93-1.46) |
| De Stefani et al. 1999 | Esophageal cancer                  | 1.08(0.85-1.38) |
| De Stefani et al. 2006 | Esophageal squamous cell carcinoma | 1.12(0.88-1.44) |
| Jessri et al. 2011     | Esophageal squamous cell carcinoma | 1.08(0.86-1.37) |
| Lagergren et al. 2013  | Esophageal adenocarcinoma          | 1.14(0.89-1.45) |
| Lagergren et al. 2013  | Esophageal squamous cell carcinoma | 1.11(0.87-1.42) |
| Mayne et al. 2001      | Esophageal adenocarcinoma          | 1.08(0.85-1.38) |
| Mayne et al. 2001      | Esophageal squamous cell carcinoma | 1.07(0.85-1.36) |
| Tuyns et al. 1987      | Esophageal cancer                  | 1.18(0.95-1.46) |
| Tzonou et al. 1996     | Esophageal adenocarcinoma          | 1.14(0.89-1.46) |
| Tzonou et al. 1996     | Esophageal squamous cell carcinoma | 1.11(0.87-1.43) |
| Wolfgarten et al. 2001 | Esophageal adenocarcinoma          | 1.09(0.86-1.37) |
| Wolfgarten et al. 2001 | Esophageal squamous cell carcinoma | 1.10(0.87-1.39) |
| Wu et al. 2007         | Esophageal adenocarcinoma          | 1.06(0.84-1.33) |
| Zhang et al. 1997      | Esophageal adenocarcinoma          | 1.15(0.90-1.47) |
| Combined               |                                    | 1.11(0.88-1.40) |
